# Supplementary material for: An antibiotic concentration gradient microfluidic device integrating surface-enhanced Raman spectroscopy for multiplex antimicrobial susceptibility testing
Source: Royal Society of Chemistry journal article supplement (doi:10.1039/d2lc00012a), 2022-01-01
Supplement: d2lc00012a1.pdf [file d2lc00012a1.pdf]

## 1 Supporting Information

## 2 An antibiotic concentration gradient microfluidic device integrating surface-enhanced 3 Raman spectroscopy for multiplex antimicrobial susceptibility testing

4 Shang-Jyun Lin<sup>1</sup>, Po-Hsuan Chao<sup>1</sup>, Ho-Wen Cheng<sup>2,3</sup>, Juen-Kai Wang<sup>2,4,5</sup>, Yuh-Lin Wang,<sup>4</sup> Yin-Yi Han<sup>6,7</sup>, Nien-Tsu Huang<sup>1,8\*</sup>

5 <sup>1</sup>Graduate Institute of Biomedical Electronics and Bioinformatics, National Taiwan University, Taipei, Taiwan

6 <sup>2</sup>Institute of Atomic and Molecular Sciences, Academia Sinica, Taipei, Taiwan

7 <sup>3</sup>International Graduate Program of Molecular Science and Technology, National Taiwan University (NTU-MST) and Taiwan

8 International Graduate Program (TIGP), Academia Sinica, Taipei, Taiwan

9 <sup>4</sup>Center for Condensed Matter Sciences, National Taiwan University, Taipei, Taiwan

10 <sup>5</sup>Center for Atomic Initiative for New Materials, National Taiwan University, Taipei, Taiwan

11 <sup>6</sup>Department of Anesthesiology, National Taiwan University Hospital, Taipei, Taiwan

12 <sup>7</sup>Department of Trauma, National Taiwan University Hospital, Taipei, Taiwan

13 <sup>8</sup>Department of Electrical Engineering, National Taiwan University, Taipei, Taiwan

14 \*Corresponding authors, e-mail: nthuang@ntu.edu.tw (N.-T.H)

15

## 16 Supplementary Figures

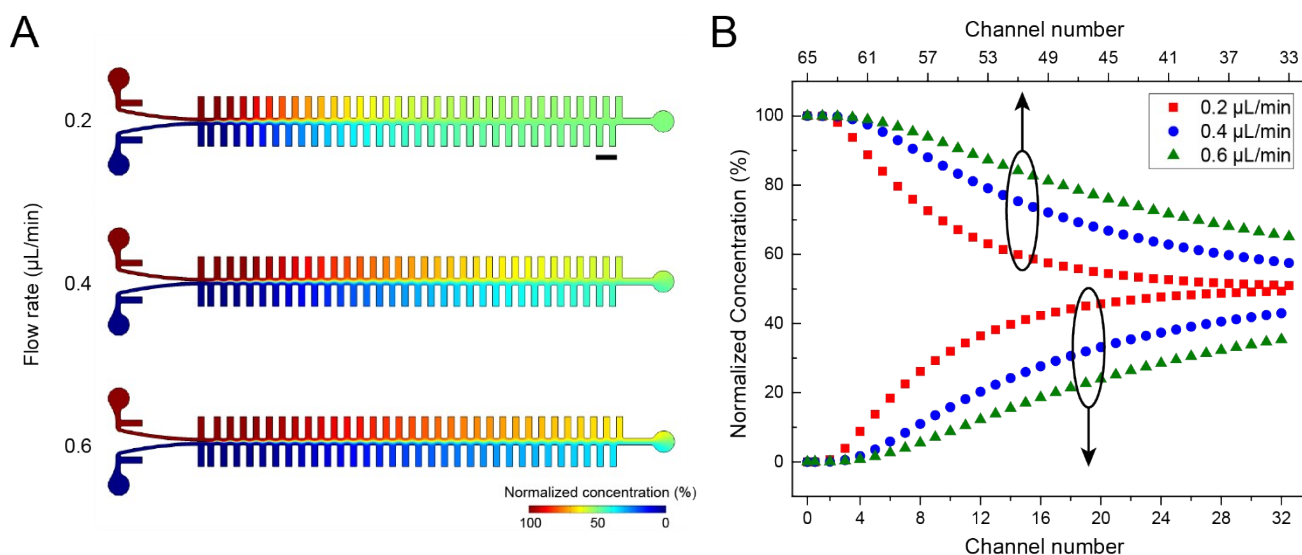

17

18 Figure S1 COMSOL simulation of (A) concentration distribution. Scale bar: 1 mm. (B) The normalized

19 concentration profiles for 0.2 (red), 0.4 (blue) and 0.6 (green)  $\mu\text{L}/\text{min}$ .

A

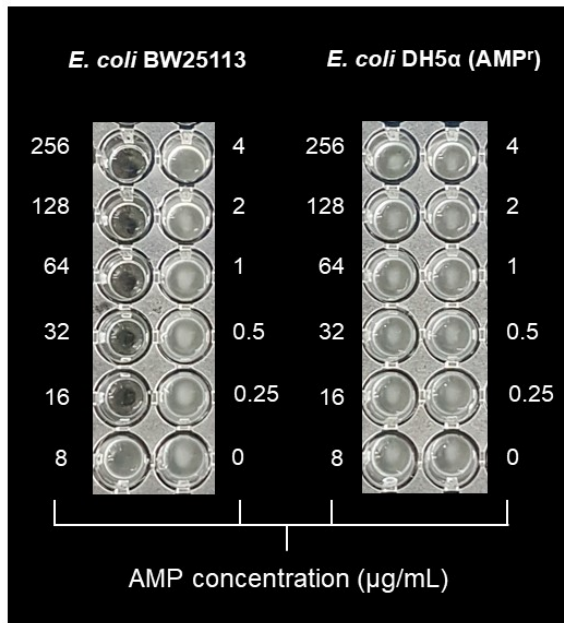

B

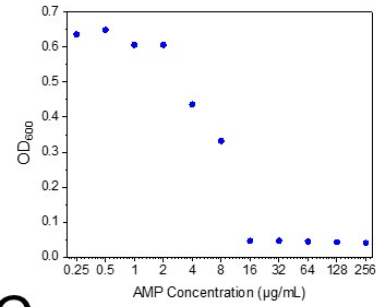

C

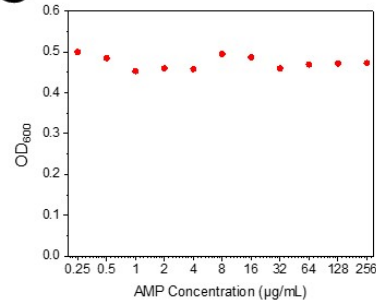

20

21 Figure S2. (A) MIC determination of susceptible and resistant *E. coli* strains using the BMD method; OD  
 22 values of (B) susceptible and (C) resistant *E. coli* strains were calculated at AMP concentration of 0, 0.25, 0.5,  
 23 1, 2, 4, 8, 16, 32, 64, 128 and 256 μg/mL. Based on the plots, we can determine that the MIC value of  
 24 susceptible *E. coli* is 16 μg/mL, while the MIC value of this resistant strain was higher than 256 μg/mL.

25
